# Supplementary material for: A fractal kinetics SI model can explain the dynamics of COVID-19 epidemics
Source: PLoS One. 2020 Aug 11;15(8):e0237304. doi: 10.1371/journal.pone.0237304 (PMC7418974; doi:10.1371/journal.pone.0237304)
Supplement: S5 File — The PCA data for the 55 Countries appearing in Fig 4. The file contains the 3 Principle Components for each country. PCA was performed using the python scikit-learn library [21]. (CSV) [file pone.0237304.s005.csv]

	PC1	PC2	PC3
Australia	0.9305439276857518	-0.6506486220160373	0.4925824301571796
Korea, South	0.717440010254357	-0.0655216733284956	-0.23437408961559494
Thailand	0.7692321059797596	0.24074736770975072	-0.0018372191525868754
South Africa	0.7318345068288046	0.7031322524376435	0.21917758107887542
Malaysia	0.3396607407722579	0.0013718571101406837	-0.13001280673246776
US	0.2569981839850957	-0.09146133771387423	-0.16665124047837085
Canada	0.23983286311645483	-0.0808451036508801	-0.15422241531101372
Germany	0.238195881455192	-0.08374588046661192	-0.15566850220882328
Spain	0.21708730246746305	-0.08299903519526304	-0.1486186158471571
Italy	0.1617486829975446	-0.06805665989659612	-0.1214093988944013
Finland	0.16819189347244784	-0.0492904693143521	-0.11081428550450438
Israel	0.14345881000337296	-0.06131604701409137	-0.11120610547804616
China	0.3101882115062748	0.3635144530763983	0.12216082825503694
Luxembourg	0.11561131631215657	-0.06017067768678493	-0.10179011035772077
Austria	0.111552550224302	-0.05227712250018721	-0.09523169370648861
Dominican Republic	0.1280753094168101	0.0019367460890422628	-0.06397477072393917
Belgium	0.07662895546353511	-0.05365978734076232	-0.08531494499660448
Croatia	0.07932357152228546	-0.020734154826788025	-0.06405250624274723
Switzerland	0.029517652370459543	-0.04006530302012657	-0.061561287931663246
United Kingdom	-0.04861655039991996	-0.027877964748401988	-0.029118558382897713
Philippines	-0.050678061092051606	-0.02572058149403485	-0.027030395456477535
Ukraine	-0.060453218233759404	0.005956794237425119	-0.0027334916639253294
Ecuador	-0.07442720175851379	-0.007329335151293333	-0.007311686356268341
Portugal	-0.0798346535807816	-0.018714038968030974	-0.013273802147300139
Turkey	-0.10815638930443713	-0.01046072817781273	0.0010603662462725758
Ireland	-0.11238358748362247	-0.012456856734717489	0.0010332463090270947
Saudi Arabia	-0.10234654641152113	0.02190951775602502	0.020982765759841187
Netherlands	-0.12246298046265752	-0.010471839315887788	0.005495483662891431
Pakistan	-0.08772394854817195	0.07005546945643859	0.048757030692126835
Czechia	-0.13728900919127357	-0.005547336593257301	0.013404623234771717
Argentina	-0.1379403438732246	0.010158152934870239	0.024148210575317203
Singapore	-0.15238115185759848	-0.004964147253252507	0.018482562396331483
Mexico	-0.1539826624592786	0.001614900365093534	0.023395649292990282
Algeria	-0.1588361313660164	-0.0032791618563158187	0.021617945670326665
Chile	-0.16172623312214177	-0.0025750742121176578	0.022987973625487244
Indonesia	-0.13636516130697604	0.056886006105984356	0.05502223288873276
Norway	-0.17248184101701533	-0.00013524778308643	0.027965455803548898
Serbia	-0.17685481636057926	9.641551442436602e-05	0.029478869904411602
Poland	-0.17838086799175612	0.001178041519432983	0.03067872333072247
Romania	-0.18061792933242138	0.0006745014891780516	0.031035420231054316
Iran	-0.1822865260102361	0.0014613623107791699	0.032081694894025514
Japan	-0.18483059377188057	0.002001270694792551	0.033234075114720506
India	-0.1899226885491135	0.002667192721747389	0.035262263976495144
Russia	-0.1959890973088425	0.003986880400403483	0.0380318024794912
United Arab Emirates	-0.201549337653159	0.005196457977304568	0.040570257726564696
Egypt	-0.20712411277261294	0.006423137542951062	0.043124705022591046
Estonia	-0.20790308709483432	0.006594382356709309	0.043481534553555835
France	-0.20794167461962984	0.006587050282324698	0.0434885958466262
Panama	-0.21254811611948152	0.007606173628578675	0.04560304077264976
Greece	-0.21661009304007459	0.008485849515844432	0.04745481967542746
Colombia	-0.21870141752317085	0.008932012239405413	0.04840369017334653
Brazil	-0.2265266548557875	0.010630036525804801	0.05197332635178511
Peru	-0.23682888066476332	0.01287118806827174	0.0566766732820652
Denmark	-0.23930550397015424	0.013409953985891055	0.05780734337595255
Qatar	-0.24311540672686244	0.014238762206403835	0.05954670482875495
